# Supplementary material
Source: PubMed Central journal article supplement (PMC6610508)
Supplement: 851822_App1_online_supp.pdf [file 851822_App1_online_supp.pdf]

## Appendix 1:

### Risk factors for each risk assessment equation

| Risk assessment equation                                        | Risk factors                                                                                                                                                                                                 |
|-----------------------------------------------------------------|--------------------------------------------------------------------------------------------------------------------------------------------------------------------------------------------------------------|
| Framingham                                                      | Age, sex, systolic blood pressure (and whether or not it is being treated), total cholesterol, HDL, smoking status and diabetes status                                                                       |
| UKPDS                                                           | Age, sex, diabetes duration, HbA1c, systolic blood pressure, total cholesterol, HDL, atrial fibrillation, ethnicity and smoking status                                                                       |
| International Model to Predict Recurrent Cardiovascular Disease | Age, sex, smoking status, diabetes status, BMI <20 kg/m <sup>2</sup> , number of vascular beds affected, cardiovascular event in past year, congestive heart failure, statin therapy, ASA therapy, ethnicity |

Al Hamarneh Y.N., et al. Pharmacist prescribing and care improves cardiovascular risk, but is it cost-effective? cost-effectiveness analysis of the Rx EACH study. *Can Pharm J* (Ott) 2019;152(4). DOI: 10.1177/1715163519851822.
